# Supplementary material
Source: PubMed Central journal article supplement (PMC4343296)
Supplement: supp_mcu263_aob-14705-s01.pdf [file supp_mcu263_aob-14705-s01.pdf]

## SUPPLEMENTARY DATA

Table S1. Frequency of leafy/shoot-like structures and naked gaps in spikes of various barley double mutant lines cultivated under field conditions

| Cross-combination                 | In F <sub>7</sub> |              |      |        |            | In F <sub>8</sub> |                  |
|-----------------------------------|-------------------|--------------|------|--------|------------|-------------------|------------------|
|                                   | n                 | Variation, % |      |        |            | n                 | Variation sum, % |
|                                   |                   | A            | B    | Others | Sum        |                   |                  |
| <i>Hv-tw<sub>2</sub> × Hv-Lh</i>  | 178               | 16.8         | 9.5  | 33.2   | 59.5 ± 3.6 | 962               | 34.3 ± 1.5       |
| <i>Hv-tw<sub>2</sub> × Hv-Mf</i>  | 504               | 22.0         | 0.4  | 41.5   | 63.9 ± 2.1 | 307               | 48.2 ± 2.9       |
| <i>Hv-tw<sub>2</sub> × Hv-Hcs</i> | 112               | 0            | 17.0 | 1.8    | 18.8 ± 3.7 | 210               | 31.9 ± 3.2       |
| <i>Hv-tw<sub>2</sub> × Hv-H</i>   | 391               | 4.1          | 6.4  | 15.4   | 25.9 ± 2.3 | 785               | 20.5 ± 1.4       |
| <i>Hv-tw<sub>2</sub> × Hv-Dwh</i> | 66                | 0            | 4.5  | 1.5    | 6.0 ± 2.9  | 512               | 7.6 ± 1.2        |
| <i>Hv-tw<sub>2</sub> × Hv-Br</i>  | 89                | 2.2          | 48.3 | 13.5   | 64.0 ± 5.1 | 722               | 18.8 ± 1.5       |

*Hv-tw<sub>2</sub>* – *Hv-tweaky spike 2*; *Hv-Mf* – *Hv-Multiflorous*; *Hv-Hcs* – *Hv-Hooded on center spikelet*; *Hv-H* – *Hv-Hooded (Colsess II)*; *Hv-Dwh* – *Dense wing hood*; *Hv-Br* – *Hv-Brittle rachis*; variation types: A – leafy-like phenotype with long naked gaps in spike (see Fig. 1A–F); B – shoot-like structures within inflorescence (see Fig. 1H, I, K, L); others – with long (see Fig. 1F) or short (see Fig. 1G) spike gaps, but without leafy/shoot-like structures or with multiple bract-lemma structures forming ‘bulbs’ (see Fig. 1O).

Table S2. PCIB and HFCA effects on basic flower structures of barley single and double mutants cultivated under greenhouse conditions

| Mutant/hybrid                               | Inhibitor | n   | Spectrum of basic flowers, % |                         |                          |                         |                          |
|---------------------------------------------|-----------|-----|------------------------------|-------------------------|--------------------------|-------------------------|--------------------------|
|                                             |           |     | Normal                       | Lt                      | SO                       | Lt+SO                   | Sum                      |
|                                             |           |     |                              |                         | (1)                      | (2)                     | (1+2)                    |
| <i>Hv-tw<sub>2</sub></i> (-)                | 0         | 80  | 37.5 ± 5.4                   | 62.5 ± 5.4              | 0                        | 0                       | 0                        |
|                                             | PCIB      | 210 | 66.2 ± 3.3 <sup>c</sup>      | 25.7 ± 3.0 <sup>c</sup> | 3.3 ± 1.2                | 4.8 ± 1.5               | 8.1 ± 1.9                |
|                                             | HFCA      | 120 | 65.8 ± 4.3 <sup>c</sup>      | 10.8 ± 2.8 <sup>c</sup> | 0                        | 23.3 ± 3.9 <sup>c</sup> | 23.3 ± 3.9 <sup>c</sup>  |
| <i>Hv-Lemma hooded (Hv-Lh)</i> (-)          | 0         | 46  | 97.8 ± 2.2 <sup>3</sup>      | 0                       | 2.2 ± 2.2                | 0                       | 2.2 ± 2.2                |
|                                             | PCIB      | 76  | 97.4 ± 1.8 <sup>3</sup>      | 0                       | 2.6 ± 1.8                | 0                       | 2.6 ± 1.8 <sup>3</sup>   |
|                                             | HFCA      | 64  | 98.4 ± 1.6 <sup>3</sup>      | 0                       | 1.6 ± 1.6                | 0                       | 1.6 ± 1.6 <sup>2</sup>   |
| <i>Hv-tw<sub>2</sub> × Hv-Lh N13</i> (-)    | 0         | 65  | 60.0 ± 6.1 <sup>2</sup>      | 16.9 ± 4.7 <sup>3</sup> | 18.5 ± 4.9 <sup>3</sup>  | 4.6 ± 2.6               | 23.1 ± 5.3 <sup>3</sup>  |
|                                             | PCIB      | 92  | 78.3 ± 4.3 <sup>a1</sup>     | 3.3 ± 1.9 <sup>b3</sup> | 12.0 ± 3.4 <sup>1</sup>  | 6.5 ± 2.6               | 18.5 ± 4.1               |
|                                             | HFCA      | 101 | 96.0 ± 2.0 <sup>c3</sup>     | 0                       | 4.0 ± 2.0 <sup>b1</sup>  | 0                       | 4.0 ± 2.0 <sup>c</sup>   |
| <i>Hv-tw<sub>2</sub> × Hv-Lh N11</i> (+)    | 0         | 64  | 26.6 ± 5.6                   | 18.8 ± 4.9 <sup>3</sup> | 18.8 ± 4.9 <sup>3</sup>  | 35.9 ± 6.0 <sup>3</sup> | 54.7 ± 6.3 <sup>3</sup>  |
|                                             | PCIB      | 96  | 59.4 ± 5.0 <sup>c</sup>      | 24.0 ± 4.4              | 8.3 ± 2.8                | 8.3 ± 2.8 <sup>c</sup>  | 16.7 ± 3.8 <sup>c1</sup> |
|                                             | HFCA      | 91  | 82.4 ± 4.0 <sup>c2</sup>     | 11.0 ± 3.3              | 5.5 ± 2.4 <sup>a1</sup>  | 1.1 ± 1.1 <sup>c3</sup> | 6.6 ± 2.6 <sup>c3</sup>  |
| <i>Hv-tw<sub>2</sub> × Hv-Lh N19</i> (+)    | 0         | 111 | 96.4 ± 1.8 <sup>3</sup>      | 0                       | 2.7 ± 1.5                | 0.9 ± 0.9               | 3.6 ± 1.8                |
|                                             | PCIB      | 109 | 78.9 ± 3.9 <sup>c1</sup>     | 2.8 ± 1.6 <sup>3</sup>  | 13.8 ± 3.3 <sup>b2</sup> | 4.6 ± 2.0               | 18.3 ± 3.7 <sup>c1</sup> |
|                                             | HFCA      | 111 | 82.0 ± 3.7 <sup>c2</sup>     | 0.9 ± 0.9 <sup>3</sup>  | 9.9 ± 2.8 <sup>a3</sup>  | 7.2 ± 2.5 <sup>a3</sup> | 17.1 ± 3.6 <sup>c</sup>  |
| <i>Hv-tw<sub>2</sub> × Hv-Hooded N6</i> (+) | 0         | 74  | 93.2 ± 2.9 <sup>3</sup>      | 0                       | 5.4 ± 2.6 <sup>1</sup>   | 1.4 ± 1.4               | 6.8 ± 2.9 <sup>1</sup>   |
|                                             | PCIB      | 139 | 91.4 ± 2.4 <sup>3</sup>      | 1.4 ± 1.0 <sup>3</sup>  | 5.0 ± 1.9                | 2.2 ± 1.2               | 7.2 ± 2.2                |
|                                             | HFCA      | 100 | 95.0 ± 2.2 <sup>3</sup>      | 0                       | 5.0 ± 2.2 <sup>1</sup>   | 0                       | 5.0 ± 2.2 <sup>3</sup>   |

Flower variations: Lt – lodicule transformation into sexual organs; SO – only the number of flower organs is changed; (+, -) – formation of leafy/shoot-like structures: (+) – present, (-) – absent, (+-) – present under field conditions, absent in greenhouse; n – the number of tested flowers. In *WT* (cv. ‘Aukšiniai II’), mutant *Hv-Hooded* and in hybrid *Hv-tw<sub>2</sub> × Hv-Hooded* N21 – all flowers of *WT* phenotype with respective n for 0, PCIB, HFCA: 78-88-126; 86-138-146; 71-119-85; a, b, c – in comparison with the respective control (0): a –  $P < 0.05$ ; b –  $P < 0.01$ ; c –  $P < 0.001$ ; 1, 2, 3 – in comparison with the respective test-condition of mutant *Hv-tw<sub>2</sub>*: 1 –  $P < 0.05$ ; 2 –  $P < 0.01$ ; 3 –  $P < 0.001$ .

Table S3. Effects of PCIB and HFCA on the development of ectopic flower structures in barley single and double mutants cultivated under greenhouse conditions

| Mutant/<br>hybrid                | Inhibitor | Ectopic<br>flower<br>structures,<br>% | n   | Spectrum of ectopic flowers with sexual organs, % |                         |                         |                        |            |           |                        | Without<br>sexual<br>organs, % |
|----------------------------------|-----------|---------------------------------------|-----|---------------------------------------------------|-------------------------|-------------------------|------------------------|------------|-----------|------------------------|--------------------------------|
|                                  |           |                                       |     | L+S+P                                             | S+P                     | L+S                     | L+P                    | S          | P         | Others                 |                                |
| <i>Hv-Hooded</i>                 | 0         | 100                                   | 103 | 39.8 ± 4.8                                        | 28.2 ± 4.5              | 8.7 ± 2.8               | 0                      | 6.8 ± 2.5  | 0         | 12.6 ± 3.3             | 3.9 ± 1.9                      |
| <i>(Hv-H) (-)</i>                | PCIB      | 100                                   | 180 | 3.9 ± 1.4 <sup>c</sup>                            | 1.1 ± 0.8 <sup>c</sup>  | 70.0 ± 3.4 <sup>c</sup> | 0                      | 9.4 ± 2.2  | 0         | 5.6 ± 1.7              | 10.0 ± 2.2 <sup>a</sup>        |
|                                  | HFCA      | 100                                   | 155 | 21.3 ± 3.3 <sup>b</sup>                           | 8.4 ± 2.2 <sup>c</sup>  | 53.5 ± 4.0 <sup>c</sup> | 1.3 ± 0.9              | 10.3 ± 2.4 | 0         | 2.6 ± 1.3 <sup>b</sup> | 2.6 ± 1.3                      |
| <i>Hv-tw<sub>2</sub> ×</i>       | 0         | 100                                   | 83  | 55.4 ± 5.5                                        | 13.3 ± 3.7              | 10.8 ± 3.4              | 0                      | 6.0 ± 2.6  | 0         | 0                      | 14.5 ± 3.9                     |
| <i>Hv-H N6</i><br>(+)            | PCIB      | 98.6 ± 1.0                            | 141 | 14.2 ± 3.0 <sup>c</sup>                           | 39.0 ± 4.1 <sup>c</sup> | 1.4 ± 1.0 <sup>b</sup>  | 0.7 ± 0.7              | 9.2 ± 2.4  | 1.4 ± 1.0 | 2.1 ± 1.2              | 31.9 ± 3.9 <sup>b</sup>        |
|                                  | HFCA      | 96.3 ± 1.8 <sup>a</sup>               | 103 | 37.9 ± 4.8 <sup>a</sup>                           | 30.1 ± 4.5 <sup>c</sup> | 4.9 ± 2.1               | 2.9 ± 1.7              | 1.9 ± 1.4  | 1.0 ± 1.0 | 0                      | 21.4 ± 4.1                     |
| <i>Hv-Lemma</i><br><i>hooded</i> | 0         | 48.6 ± 4.3                            | 67  | 0                                                 | 0                       | 0                       | 0                      | 0          | 0         | 0                      | 100                            |
|                                  | PCIB      | 69.7 ± 3.1 <sup>c</sup>               | 159 | 0                                                 | 0                       | 0                       | 0                      | 0.6 ± 0.6  | 0         | 0                      | 99.4 ± 0.6                     |
| <i>(Hv-Lh) (-)</i>               | HFCA      | 71.9 ± 3.3 <sup>c</sup>               | 138 | 0                                                 | 0                       | 0                       | 0                      | 0          | 0         | 0                      | 100                            |
|                                  | 0         | 95.7 ± 1.6                            | 155 | 0                                                 | 0                       | 0                       | 0                      | 0          | 0         | 0                      | 100                            |
| <i>Hv-Lh N13</i><br>(-)          | PCIB      | 98.1 ± 1.0                            | 202 | 0                                                 | 0                       | 0                       | 0                      | 0          | 0         | 0                      | 100                            |
|                                  | HFCA      | 98.6 ± 0.7                            | 273 | 0                                                 | 0                       | 0                       | 0                      | 0          | 0.4 ± 0.4 | 0                      | 99.6 ± 0.4                     |
| <i>Hv-tw<sub>2</sub> ×</i>       | 0         | 87.1 ± 3.5                            | 81  | 0                                                 | 0                       | 0                       | 0                      | 1.2 ± 1.2  | 0         | 0                      | 98.8 ± 1.2                     |
| <i>Hv-Lh N11</i><br>(+)          | PCIB      | 77.1 ± 4.3                            | 74  | 0                                                 | 1.4 ± 1.4               | 0                       | 0                      | 0          | 0         | 0                      | 98.6 ± 1.4                     |
|                                  | HFCA      | 93.6 ± 2.4                            | 102 | 0                                                 | 0                       | 0                       | 0                      | 0          | 0         | 0                      | 100                            |
| <i>Hv-tw<sub>2</sub> ×</i>       | 0         | 96.6 ± 1.7                            | 112 | 26.8 ± 4.2                                        | 19.6 ± 3.8              | 5.4 ± 2.1               | 0                      | 3.6 ± 1.8  | 0.9 ± 0.9 | 0                      | 43.8 ± 4.7                     |
| <i>Hv-Lh N19</i><br>(+)          | PCIB      | 100                                   | 111 | 7.2 ± 2.5 <sup>c</sup>                            | 12.6 ± 3.2              | 0.9 ± 0.9 <sup>a</sup>  | 1.8 ± 1.3              | 3.6 ± 1.8  | 1.8 ± 1.3 | 4.5 ± 2.0 <sup>a</sup> | 67.6 ± 4.5 <sup>c</sup>        |
|                                  | HFCA      | 82.5 ± 3.5 <sup>c</sup>               | 99  | 6.1 ± 2.4 <sup>c</sup>                            | 5.1 ± 2.2 <sup>c</sup>  | 4.0 ± 2.0               | 4.0 ± 2.0 <sup>a</sup> | 3.0 ± 1.7  | 1.0 ± 1.0 | 3.0 ± 1.7              | 73.7 ± 4.4 <sup>c</sup>        |

Flower organs and variations: L – lodicules; S – stamens; P – pistils; Others – chimeric or not fully developed organs; (+, -) – as in Table S2; n – number of tested flowers; a, b, c – in comparison with the respective control (0): a –  $P < 0.05$ , b –  $P < 0.01$ , c –  $P < 0.001$ .

Table S4. Effects of 2,4-D on the basic and ectopic flower structures of selected barley single and double mutant lines (F<sub>10</sub>) cultivated under field conditions

| Mutant/<br>hybrid                                            | Treat-<br>ment | n   | Basic flower structures, % |                         |                         |                         | Ectopic flower structures <sup>1</sup> , % |                         |                         |            |                         |                             |
|--------------------------------------------------------------|----------------|-----|----------------------------|-------------------------|-------------------------|-------------------------|--------------------------------------------|-------------------------|-------------------------|------------|-------------------------|-----------------------------|
|                                                              |                |     | Normal                     | Lt                      | Lt+SO                   | Sc                      | Common<br>frequency                        | L+S+P                   | S+P                     | L+S        | L+P                     | Without<br>sexual<br>organs |
| <i>Hv-tw<sub>2</sub></i> (-)                                 | 0              | 101 | 22.8 ± 4.2                 | 68.3 ± 4.7              | 8.9 ± 2.8               | 0                       | 0                                          | 0                       | 0                       | 0          | 0                       |                             |
|                                                              | 2,4-D          | 100 | 33.0 ± 4.7                 | 33.0 ± 4.7 <sup>c</sup> | 34.0 ± 4.8 <sup>c</sup> | 0                       | 0                                          | 0                       | 0                       | 0          | 0                       |                             |
| <i>Hv-Hooded</i><br>( <i>Hv-H</i> ) (-)                      | 0              | 102 | 100                        | 0                       | 0                       | 0                       | 100                                        | 15.7 ± 3.6              | 23.5 ± 4.2              | 9.8 ± 3.0  | 0                       | 15.7 ± 3.6                  |
|                                                              | 2,4-D          | 128 | 100                        | 0                       | 0                       | 0                       | 100                                        | 25.0 ± 3.8              | 35.9 ± 4.3 <sup>a</sup> | 13.3 ± 3.0 | 0                       | 21.9 ± 3.7                  |
| <i>Hv-tw<sub>2</sub></i> × <i>Hv-H</i><br>N6 (+)             | 0              | 51  | 68.6 ± 6.6                 | 21.6 ± 5.8              | 9.8 ± 4.2               | 0                       | 100                                        | 19.6 ± 5.6              | 0                       | 0          | 9.8 ± 4.2               | 52.9 ± 7.1                  |
|                                                              | 2,4-D          | 60  | 71.7 ± 5.9                 | 8.3 ± 3.6               | 16.7 ± 4.9              | 3.3 ± 2.3               | 100                                        | 41.5 ± 6.8 <sup>a</sup> | 0                       | 0          | 15.1 ± 5.0              | 39.6 ± 6.8                  |
| <i>Hv-tw<sub>2</sub></i> × <i>Hv-H</i><br>N21 (+)            | 0              | 96  | 88.5 ± 3.3                 | 3.1 ± 1.8               | 8.3 ± 2.8               | 0                       | 0                                          | 0                       | 0                       | 0          | 0                       | 0                           |
|                                                              | 2,4-D          | 100 | 65.0 ± 4.8 <sup>c</sup>    | 18.0 ± 3.9 <sup>c</sup> | 17.0 ± 3.8              | 0                       | 0                                          | 0                       | 0                       | 0          | 0                       | 0                           |
| <i>Hv-Lemma</i><br><i>hooded</i> ( <i>Hv-Lh</i> )<br>(-)     | 0              | 65  | 100                        | 0                       | 0                       | 0                       | 57.7 ± 3.5                                 | 0                       | 0                       | 0          | 0                       | 100                         |
|                                                              | 2,4-D          | 100 | 93.0 ± 2.6 <sup>b</sup>    | 1.0 ± 1.0               | 6.0 ± 2.4 <sup>a</sup>  | 0                       | 56.3 ± 3.0                                 | 0                       | 0                       | 0          | 0                       | 100                         |
| <i>Hv-tw<sub>2</sub></i> × <i>Hv-Lh</i><br>N1 (+)            | 0              | 97  | 48.5 ± 5.1                 | 44.3 ± 5.1              | 7.2 ± 2.6               | 0                       | 100                                        | 5.5 ± 2.4               | 12.1 ± 3.4              | 0          | 0                       | 80.2 ± 4.2                  |
|                                                              | 2,4-D          | 100 | 39.0 ± 4.9                 | 44.0 ± 5.0              | 15.0 ± 3.6              | 2.0 ± 1.4               | 100                                        | 35.6 ± 5.1 <sup>c</sup> | 0 <sup>c</sup>          | 0          | 10.0 ± 3.2 <sup>b</sup> | 54.4 ± 5.3 <sup>c</sup>     |
| <i>Hv-tw<sub>2</sub></i> × <i>Hv-Lh</i><br>N2 (+)            | 0              | 98  | 58.2 ± 5.0                 | 16.3 ± 3.8              | 25.5 ± 4.4              | 0                       | 93.4 ± 2.6                                 | 0                       | 7.1 ± 2.8               | 0          | 0                       | 92.9 ± 2.8                  |
|                                                              | 2,4-D          | 91  | 34.1 ± 5.0 <sup>c</sup>    | 23.1 ± 4.4              | 39.6 ± 5.2 <sup>a</sup> | 3.3 ± 1.9               | 96.4 ± 2.0                                 | 1.2 ± 1.2               | 0 <sup>a</sup>          | 0          | 22.2 ± 4.6 <sup>c</sup> | 76.5 ± 4.7 <sup>b</sup>     |
| <i>Hv-tw<sub>2</sub></i> × <i>Hv-Lh</i><br>N11 (+)           | 0              | 185 | 23.2 ± 3.1                 | 8.6 ± 2.1               | 64.3 ± 3.5              | 3.8 ± 1.4               | 61.9 ± 3.6                                 | 0                       | 0                       | 0          | 0                       | 100                         |
|                                                              | 2,4-D          | 102 | 21.6 ± 4.1                 | 3.9 ± 1.9               | 59.8 ± 4.9              | 14.7 ± 3.5 <sup>b</sup> | 61.2 ± 4.8                                 | 0                       | 0                       | 0          | 0                       | 100                         |
| <i>Hv-tw<sub>2</sub></i> × <i>Hv-Lh</i><br>N17<br>(+ -)      | 0              | 113 | 38.1 ± 4.6                 | 22.1 ± 3.9              | 39.8 ± 4.6              | 0                       | 86.5 ± 3.6                                 | 0                       | 0                       | 0          | 0                       | 88.3 ± 3.7                  |
|                                                              | 2,4-D          | 104 | 38.5 ± 4.8                 | 12.5 ± 3.3              | 43.3 ± 4.9              | 5.8 ± 2.3 <sup>a</sup>  | 90.0 ± 3.2                                 | 0                       | 0                       | 0          | 0                       | 98.8 ± 1.2 <sup>b</sup>     |
| <i>Hv-tw<sub>2</sub></i> × <i>Hv-Lh</i><br><i>Lh</i> N19 (+) | 0              | 127 | 66.1 ± 4.2                 | 3.1 ± 1.5               | 30.7 ± 4.1              | 0                       | 93.5 ± 2.2                                 | 6.0 ± 2.2               | 30.2 ± 4.3              | 0          | 0                       | 48.3 ± 4.7                  |
|                                                              | 2,4-D          | 100 | 65.0 ± 4.8                 | 4.0 ± 2.0               | 28.0 ± 4.5              | 3.0 ± 1.7               | 98.0 ± 1.4                                 | 22.4 ± 4.2 <sup>c</sup> | 0 <sup>c</sup>          | 0          | 21.4 ± 4.2 <sup>c</sup> | 53.1 ± 5.1                  |

<sup>1</sup>Only part of variations in the spectrum is shown; (+, -) – as in Table S2; n – the number of tested flowers; flower organs: L – lodicule; S – stamen; P – pistil; variations in basic flowers: Lt – transformation of lodicules into stamens and/or pistils; Lt+SO – flowers with lodicule transformation and altered number of flower organs (L, S or P); Sc – chimeric stamens with partially developed carpel structures; a, b, c – in comparison with respective 2,4-D untreated plants (0): a –  $P < 0.05$ , b –  $P < 0.01$ , c –  $P < 0.001$ .
